# Supplementary material for: Tailoring the preferable orientation relationship and shape of α-FeSi2 nanocrystals on Si(001): the impact of gold and the Si/Fe flux ratio, and the origin of α/Si boundaries
Source: Royal Society of Chemistry journal article supplement (doi:10.1039/d0ce00399a), 2020-01-01
Supplement: d0ce00399a2.xlsx [file d0ce00399a2.xlsx]

## Sheet: Orientation relationship aSi
	Si			alpha			Si			Si			Si vector #1 length	misfit	Alpha vector #2 length	Si angle	angle misfit	Alpha angle	Si vector #2 length	misfit	Alpha vector #2 length	Alpha			Alpha			atomic packing density						epitaxial strain
	h	k	l	h	k	l	u1	v1	w1	u2	v2	w2					%					u1	v1	w1	u2	v2	w2	Si u1v1w1	Si u2v2w2	Alpha u1v1w1	Alpha u2v2w2			%
	0	0	1	0	0	1	3	0	0	0	4	0	16.2921	-1.15455	16.104	90	0	90	21.7228	1.15455	21.472	6	0	0	0	8	0	0.18414	0.18414	0.372578	0.372578			1.01155
	0	0	-1	0	0	1	1	1	0	1	-1	0	7.68017	4.84143	8.052	90	0	90	7.68017	4.84143	8.052	3	0	0	0	3	0	0.26041	0.26041	0.372578	0.372578			3.99919
	0	0	-1	0	0	-1	0.5	0.5	0	1	0	0	3.84008	-1.15455	3.79575	45	7.10543e-15	45	5.4307	1.15455	5.368	1	1	0	2	0	0	0.26041	0.18414	0.263453	0.372578			1.01155
	0	0	1	0	0	-1	2	0	0	2.5	2.5	0	10.8614	4.84143	11.3872	45	7.10543e-15	45	19.2004	2.14799	18.788	3	3	0	7	0	0	0.18414	0.26041	0.263453	0.372578			2.60741
	0	0	-1	1	-1	-1	0.5	0.5	0	2	-1	0	3.84008	-1.15455	3.79575	71.5651	0.706513	70.8585	12.1434	4.82619	11.5759	1	1	0	2	0	2	0.26041	0.08235	0.263453	0.172773			3.00672
	0	0	-1	-1	1	1	1.5	1.5	0	-1	-3	0	11.5203	0.482836	11.5759	153.435	0.82397	154.259	17.1734	4.09454	16.5132	2	0	2	-1	2	-3	0.26041	0.11646	0.172773	0.0605575			3.98852
	0	0	-1	-1	-1	1	1.5	1.5	0	3	1	0	11.5203	0.482836	11.5759	26.5651	0.82397	25.7411	17.1734	4.09454	16.5132	2	0	2	1	2	3	0.26041	0.11646	0.172773	0.0605575			3.98852
	0	0	1	1	-1	-1	2	0	0	1	3	0	10.8614	4.84143	11.3872	71.5651	0.706513	70.8585	17.1734	1.66344	17.3638	3	3	0	3	0	3	0.18414	0.11646	0.263453	0.172773			2.49665
	0	0	-1	0	-1	2	1	1	0	3.5	-0.5	0	7.68017	4.84143	8.052	53.1301	0.999719	54.1298	19.2004	4.88045	18.3224	3	0	0	4	4	2	0.26041	0.05208	0.372578	0.327469			2.98273
	0	0	-1	0	1	-2	2.5	2.5	0	2.5	-0.5	0	19.2004	-4.57314	18.3224	56.3099	2.18011	54.1298	13.8456	4.84574	13.42	4	4	2	5	0	0	0.26041	0.07222	0.327469	0.372578			4.85483
	0	0	1	0	-1	2	3	0	0	2.5	1.5	0	16.2921	-1.15455	16.104	30.9638	2.01308	28.9507	15.8331	4.66826	15.3365	6	0	0	5	2	1	0.18414	0.06316	0.372578	0.130408			5.18167
	0	0	-1	1	0	-2	2.5	2.5	0	0.5	-2.5	0	19.2004	-4.57314	18.3224	123.69	2.18011	125.87	13.8456	4.84574	13.42	4	4	2	0	-5	0	0.26041	0.07222	0.327469	0.372578			4.85483
	0	0	-1	-1	0	2	1	1	0	1	-1	0	7.68017	-3.33895	7.42373	90	0	90	7.68017	4.84143	8.052	2	0	1	0	3	0	0.26041	0.26041	0.269406	0.372578			2.07998
	0	0	-1	0	-1	1	1	1	0	1.5	-1.5	0	7.68017	4.84143	8.052	90	0	90	11.5203	0.482836	11.5759	3	0	0	0	2	2	0.26041	0.26041	0.372578	0.172773			2.43796
	0	0	-1	-1	0	1	1.5	1.5	0	1	-1	0	11.5203	0.482836	11.5759	90	0	90	7.68017	4.84143	8.052	2	0	2	0	3	0	0.26041	0.26041	0.172773	0.372578			2.43796
	0	-1	2	0	-1	1	1	0	0	0	2	1	5.4307	-1.15455	5.368	90	0	90	12.1434	4.67361	11.5759	2	0	0	0	2	2	0.18414	0.08235	0.372578	0.172773			2.78961
	1	-1	0	1	0	-2	2.5	2.5	0	-1	-1	2	19.2004	-4.57314	18.3224	125.264	0.605789	125.87	13.3024	1.38156	13.42	4	4	2	0	-5	0	0.26041	0.15035	0.327469	0.372578			2.71468
	1	-1	0	0	1	-2	2.5	2.5	0	1	1	2	19.2004	-4.57314	18.3224	54.7356	0.605789	54.1298	13.3024	1.38156	13.42	4	4	2	5	0	0	0.26041	0.15035	0.327469	0.372578			2.71468
	1	-1	0	-1	0	2	2	2	0	0	0	4	15.3603	-3.33895	14.8475	90	0	90	21.7228	1.15455	21.472	4	0	2	0	8	0	0.26041	0.18414	0.269406	0.372578			2.08153
	0	1	-1	0	1	-2	2	2	2	4	0	0	18.8125	-2.60537	18.3224	54.7356	0.605789	54.1298	21.7228	1.56139	21.472	4	4	2	8	0	0	0.21263	0.18414	0.327469	0.372578			2.08153
	-1	1	0	1	0	-2	1	1	1	0	0	-1	9.40625	-2.60537	9.16118	125.264	0.605789	125.87	5.4307	1.56139	5.368	2	2	1	0	-2	0	0.21263	0.18414	0.327469	0.372578			2.08153
	0	1	-1	1	0	-2	2	2	2	1	-2	-2	18.8125	-2.60537	18.3224	125.264	0.605789	125.87	16.2921	1.56139	16.104	4	4	2	0	-6	0	0.21263	0.06138	0.327469	0.372578			2.08153
	-1	1	0	0	1	-2	1	1	1	2	2	-1	9.40625	-2.60537	9.16118	54.7356	0.605789	54.1298	16.2921	1.56139	16.104	2	2	1	6	0	0	0.21263	0.06138	0.327469	0.372578			2.08153
	0	-2	3	0	-1	3	1	0	0	0	3	2	5.4307	-1.15455	5.368	90	0	90	19.5807	2.493	19.0925	2	0	0	0	6	2	0.18414	0.05107	0.372578	0.104753			1.64982
	0	-1	2	0	-1	4	1	0	0	0	2	1	5.4307	-1.15455	5.368	90	0	90	12.1434	2.02246	11.8978	2	0	0	0	4	1	0.18414	0.08235	0.372578	0.168098			1.41742
	0	-2	5	0	-1	5	1	0	0	2.5	2.5	1	5.4307	-1.15455	5.368	47.124	0.173327	46.9507	19.9537	1.50536	19.6593	2	0	0	5	5	1	0.18414	0.10023	0.372578	0.152599			1.2873
	0	-1	3	0	-1	6	1	0	0	1	3	1	5.4307	-1.15455	5.368	72.4516	0.0724428	72.3792	18.0116	1.55318	17.7328	2	0	0	2	6	1	0.18414	0.11104	0.372578	0.169178			1.20942
	2	-2	-1	1	-1	-1	2.5	2.5	0	1	0	2	19.2004	-1.15455	18.9787	71.5651	0.706513	70.8585	12.1434	4.82619	11.5759	5	5	0	2	0	2	0.26041	0.08235	0.263453	0.172773			3.00672
	2	-2	-1	-1	1	1	1.5	1.5	0	2.5	1.5	2	11.5203	0.482836	11.5759	36.8699	1.77546	35.0944	19.2004	3.98044	18.7114	2	0	2	5	3	2	0.26041	0.05208	0.172773	0.0534433			3.44384
	2	-2	-1	-1	-1	1	1.5	1.5	0	-1.5	-2.5	2	11.5203	0.482836	11.5759	143.13	1.77546	144.906	19.2004	3.98044	18.7114	2	0	2	-5	3	-2	0.26041	0.05208	0.172773	0.0534433			3.44384
	-1	2	2	1	-1	-1	2	0.5	0.5	2	2	-1	11.5203	-1.15455	11.3872	45	1.15837	43.8416	16.2921	3.67865	15.7881	3	3	0	4	2	2	0.17361	0.06138	0.263453	0.126678			3.00672
	1	-1	-1	-1	1	2	2	2	0	0	-2	2	15.3603	-3.33895	14.8475	120	1.50083	118.499	15.3603	4.2167	14.8475	4	0	2	0	4	-2	0.26041	0.26041	0.269406	0.269406			2.4701
	1	-1	-1	-1	-1	2	2	2	0	2	0	2	15.3603	-3.33895	14.8475	60	1.50083	61.5008	15.3603	4.2167	14.8475	4	0	2	0	4	2	0.26041	0.26041	0.269406	0.269406			2.4701
	1	-1	-1	1	-1	-2	2.5	2.5	0	2	0	2	19.2004	-1.15455	18.9787	60	0.750413	59.2496	15.3603	3.57864	14.8475	5	5	0	4	0	2	0.26041	0.26041	0.263453	0.269406			2.4701
	2	-2	-3	1	-1	-3	2.5	2.5	0	1.5	-1.5	2	19.2004	-1.15455	18.9787	90	0	90	15.8331	3.20909	15.325	5	5	0	3	-3	2	0.26041	0.12632	0.263453	0.130506			2.01428
	1	-1	-2	1	1	-4	2.5	2.5	0	2	-2	2	19.2004	-4.57314	18.3224	90	0	90	18.8125	0.883718	18.9787	4	4	2	5	-5	0	0.26041	0.21263	0.327469	0.263453			2.20995
	1	-1	-2	1	-1	-4	2.5	2.5	0	2	-2	2	19.2004	-1.15455	18.9787	90	0	90	18.8125	2.60537	18.3224	5	5	0	4	-4	2	0.26041	0.21263	0.263453	0.327469			1.70623
	1	-1	-2	-1	1	4	1.5	1.5	0	3.5	1.5	1	11.5203	3.27739	11.8978	26.1001	1.51425	24.5859	21.3807	2.98992	21.0742	4	0	1	7	3	1	0.26041	0.09354	0.168098	0.0474515			3.68478
	1	-1	-2	-1	-1	4	1.5	1.5	0	-1.5	-3.5	1	11.5203	3.27739	11.8978	153.9	1.51425	155.414	21.3807	2.98992	21.0742	4	0	1	-7	3	-1	0.26041	0.09354	0.168098	0.0474515			3.68478
	-1	2	-1	1	1	-4	1	1	1	0.5	0	-0.5	9.40625	-2.60537	9.16118	90	0	90	3.84008	1.15455	3.79575	2	2	1	1	-1	0	0.21263	0.26041	0.327469	0.263453			1.70623
	-1	2	-1	1	-1	-4	2	2	2	2.5	0	-2.5	18.8125	0.883718	18.9787	90	0	90	19.2004	4.57314	18.3224	5	5	0	4	-4	2	0.21263	0.26041	0.263453	0.327469			2.20995
	1	-1	-3	1	-1	-6	2.5	2.5	0	2	-1	1	19.2004	-1.15455	18.9787	73.2213	0.127285	73.0941	13.3024	1.89013	13.0527	5	5	0	4	-2	1	0.26041	0.15035	0.263453	0.153225			1.37899
	-1	3	1	1	-1	-6	2	0.5	0.5	1	1	-2	11.5203	-1.15455	11.3872	73.2213	0.127285	73.0941	13.3024	1.89013	13.0527	3	3	0	4	-2	1	0.17361	0.15035	0.263453	0.153225			1.37899
	-1	1	3	1	-1	-6	2	0.5	0.5	-1	2	-1	11.5203	-1.15455	11.3872	106.779	0.127285	106.906	13.3024	1.89013	13.0527	3	3	0	2	-4	1	0.17361	0.15035	0.263453	0.153225			1.37899
	3	-3	-1	0	-1	1	2	2	0	0.5	-0.5	3	15.3603	4.84143	16.104	90	0	90	16.7385	3.73555	17.3638	6	0	0	0	3	3	0.26041	0.11948	0.372578	0.172773			3.56795
	2	-2	-3	1	0	-2	2.5	2.5	0	0	-3	2	19.2004	-4.57314	18.3224	126.04	0.169714	125.87	19.5807	4.0586	18.788	4	4	2	0	-7	0	0.26041	0.05107	0.327469	0.372578			3.81047
	2	-2	-3	0	1	-2	2.5	2.5	0	3	0	2	19.2004	-4.57314	18.3224	53.9601	0.169714	54.1298	19.5807	4.0586	18.788	4	4	2	7	0	0	0.26041	0.05107	0.327469	0.372578			3.81047
	2	-2	-3	-1	0	2	2	2	0	1.5	-1.5	2	15.3603	-3.33895	14.8475	90	0	90	15.8331	1.71113	16.104	4	0	2	0	6	0	0.26041	0.12632	0.269406	0.372578			1.49592
	1	-1	-2	0	-1	3	2	2	0	2	-2	2	15.3603	4.84143	16.104	90	0	90	18.8125	1.4885	19.0925	6	0	0	0	6	2	0.26041	0.21263	0.372578	0.104753			2.74994
	1	-1	-3	-1	0	4	1.5	1.5	0	3	0	1	11.5203	3.27739	11.8978	47.8696	0.571064	48.4406	17.1734	4.5488	17.9347	4	0	1	4	5	1	0.26041	0.11646	0.168098	0.0557577			3.61285
	1	-1	-7	0	-1	5	2	2	0	3.5	0	0.5	15.3603	4.84143	16.104	45.573	1.37769	46.9507	19.2004	3.41058	19.6593	6	0	0	5	5	1	0.26041	0.05208	0.372578	0.152599			4.10393
	0	1	-1	1	-1	-3	2	2	2	2	-1.5	-1.5	18.8125	0.883718	18.9787	101.422	2.48952	103.911	15.8331	4.34782	15.7881	5	5	0	2	-4	2	0.21263	0.12632	0.263453	0.126678			1.17033
	-1	1	0	1	-1	-3	2	2	2	1.5	1.5	-2	18.8125	0.883718	18.9787	78.5782	2.48952	76.0887	15.8331	4.34782	15.7881	5	5	0	4	-2	2	0.21263	0.12632	0.263453	0.126678			1.17033
	0	1	-1	1	-1	-3	2	0.5	0.5	3	-1.5	-1.5	11.5203	-1.15455	11.3872	54.7356	1.34986	53.3858	19.9537	4.89246	19.0925	3	3	0	6	0	2	0.17361	0.15035	0.263453	0.104753			3.48429
	0	-1	1	1	-1	-3	2	0.5	0.5	-3	1.5	1.5	11.5203	-1.15455	11.3872	125.264	1.34986	126.614	19.9537	4.89246	19.0925	3	3	0	0	-6	2	0.17361	0.15035	0.263453	0.104753			3.48429
	0	-2	3	1	-1	-4	2	0	0	3.5	1.5	1	10.8614	4.84143	11.3872	27.252	1.48509	25.7669	21.3807	2.94568	21.0742	3	3	0	7	3	1	0.18414	0.09354	0.263453	0.0474515			3.93813
	0	-2	3	1	-1	-2	2	0	0	0	3	2	10.8614	4.84143	11.3872	90	0	90	19.5807	2.25089	19.1399	3	3	0	3	-3	3	0.18414	0.05107	0.263453	0.15674			1.9996
	0	-1	2	1	-1	-6	2	0	0	2	2	1	10.8614	4.84143	11.3872	48.1897	0.54854	47.6411	16.2921	3.86099	16.9007	3	3	0	6	0	1	0.18414	0.06138	0.263453	0.118338			3.22995
	-2	2	5	1	1	3	1	1	0	-5	5	-4	7.68017	-1.15455	7.5915	90	0	90	44.1192	15.4701	50.9445	-2	2	0	-6	-6	4							6.42665
	-5	5	-6	2	2	-3	1	1	0	10	-10	-17	7.68017	-1.15455	7.5915	90	0	90	120.091	5.4739	126.665	-2	2	0	12	12	16							2.35779
	1	-1	9	2	2	1	1	1	0	-9	9	2	7.68017	-1.15455	7.5915	90	0	90	69.9697	1.2122	69.1215	-2	2	0	-1	-1	4							1.0372
	2	-2	-3	0	1	0	1.5	1.5	0	2.5	-0.5	2	11.5203	3.27739	11.8978	64.1233	1.20382	62.9195	17.5975	4.51517	16.8903	4	0	1	5	0	-2	0.26041	0.05683	0.168098	0.118411			2.33698
	2	-2	-3	0	-1	0	1.5	1.5	0	0.5	-2.5	2	11.5203	3.27739	11.8978	115.877	1.20382	117.081	17.5975	4.51517	16.8903	4	0	1	-5	0	2	0.26041	0.05683	0.168098	0.118411			2.33698
	2	-2	-3	0	1	0	2	2	0	1.5	-1.5	2	15.3603	0.154038	15.384	90	0	90	15.8331	1.71113	16.104	0	0	3	6	0	0	0.26041	0.12632	0.390016	0.372578			0.88214
	2	-2	-3	0	-1	0	2	2	0	1.5	-1.5	2	15.3603	4.84143	16.104	90	0	90	15.8331	2.83631	15.384	6	0	0	0	0	3	0.26041	0.12632	0.372578	0.390016			2.02273
	3	-3	-5	0	-1	4	2	2	0	3	0.5	1.5	15.3603	4.84143	16.104	43.1303	1.57098	41.5594	18.4164	3.76316	17.9347	6	0	0	5	4	1	0.26041	0.0543	0.372578	0.0557577			2.98773
	3	-3	-2	0	-1	1	2	2	0	1	-1	3	15.3603	4.84143	16.104	90	0	90	18.0116	3.59644	17.3638	6	0	0	0	3	3	0.26041	0.11104	0.372578	0.172773			2.12218
	3	-3	-2	1	0	-2	2.5	2.5	0	0.5	-1.5	3	19.2004	-4.57314	18.3224	102.035	0.91421	101.121	18.4164	4.02882	17.7328	4	4	2	2	-6	1	0.26041	0.0543	0.327469	0.169178			3.63273
	3	-3	-2	0	1	-2	2.5	2.5	0	1.5	-0.5	3	19.2004	-4.57314	18.3224	77.9647	0.91421	78.8789	18.4164	4.02882	17.7328	4	4	2	6	-2	-1	0.26041	0.0543	0.327469	0.169178			3.63273
	3	-3	-2	-1	0	2	2	2	0	1	-1	3	15.3603	-3.33895	14.8475	90	0	90	18.0116	4.31059	18.788	4	0	2	0	7	0	0.26041	0.11104	0.269406	0.372578			1.91928
